# Supplementary material
Source: publisher figshare collection journal article supplement (https://tandf.figshare.com/articles/dataset/_/5702080)
Supplement: Supplementary file 1 [file 1]

Archive with 2 entries (2 files):
- tjom_a_1411842_sm9217.pdf
- tjom_a_1411842_sm9216.pdf
