# Supplementary material
Source: publisher figshare collection journal article supplement (https://tandf.figshare.com/articles/dataset/_/5702080)
Supplement: Supplementary file 1 [file 1 › tjom_a_1411842_sm9217.pdf]

# Spatial Distribution of International Shipping SO<sub>2</sub> Emissions

## Year 2010

A. Alessandrini, D. Guizzardi, G. Janssens-Maenhout, E. Pisoni, M. Trombetti, M. Vespe  
European Commission, Joint Research Centre, Italy

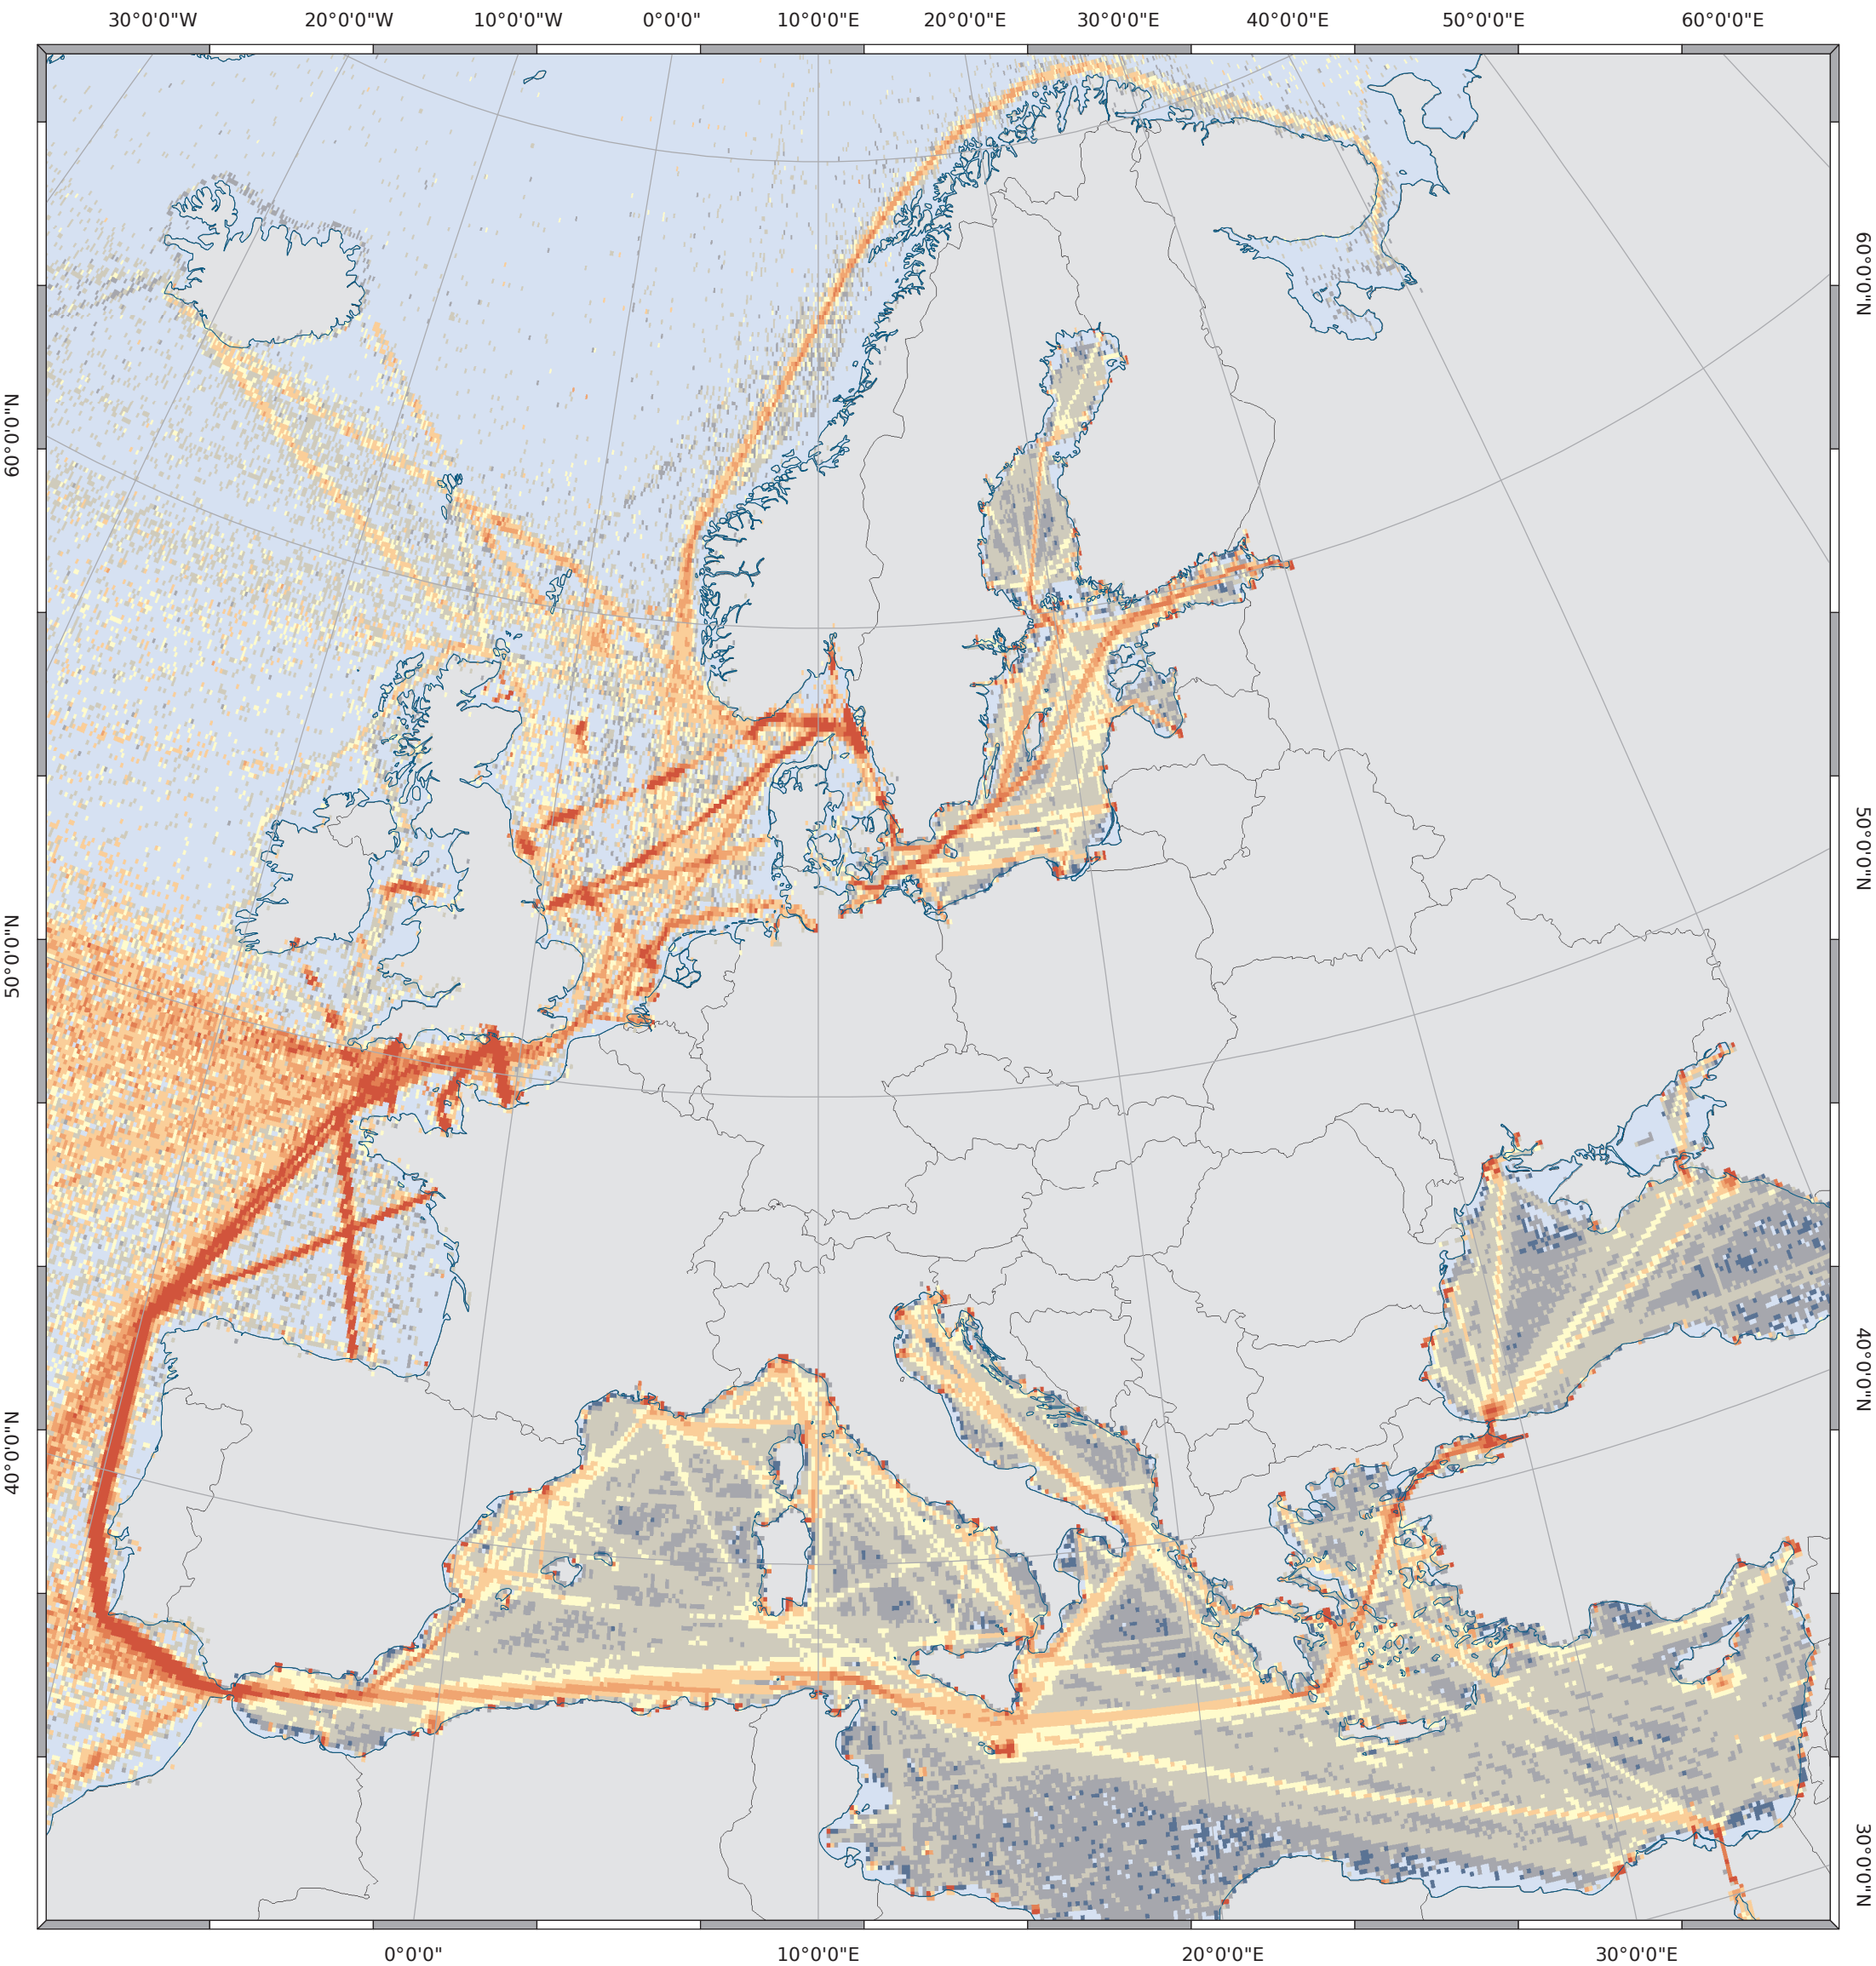

International Shipping  
SO<sub>2</sub> Emissions Year 2010  
[Tonnes/(0.1deg)<sup>2</sup>/year]

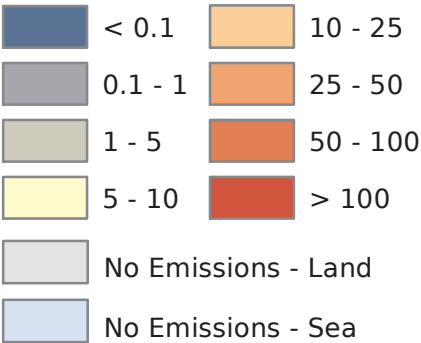

#### MAP

The map shows SO<sub>2</sub> emissions in 2010. The map underlines the importance of sulphur emissions of shipping, which was with the new EU directive of 2012 limited by ensuring that ships in the Baltic, the North Sea and the English Channel are using fuels with a sulphur content of no more than 0.10%.

#### SHIPPING DATA

The data used for the spatial gridding of shipping atmospheric emissions are a combination of the Long Range Identification and Tracking system (LRIT) for the closed sea regions of the Baltic and the Mediterranean Seas, and Wang et al. (2007) for the rest of the world. LRIT is a space-borne real ship track system providing vessel position information in real time, that has virtually no spatial limitations in the European seas. It is possible to reliably characterise vessel movements in wide areas since large merchant vessels do not change course at a high frequency rate, except in ports. Access to global LRIT data was granted by the National Competent Authorities for LRIT of States participating in the Cooperative Data Centre (CDC): all EU Member States, Iceland, Norway, and Overseas Territories of EU Member States.

Map Projection: Lambert Azimuthal Equal Area (Datum ETRS1989)  
Source Data: EDGAR SO<sub>2</sub> emissions of international shipping  
Year 2010

Country boundaries: EuroGeographics  
Ancillary Data: LRIT and Wang et al. (2007)  
Spatial Resolution: 0.1 Degrees

Copyright: © European Union, 2017  
Journal of Maps, 2017

CONTACT DETAILS: [jrc-edgar@ec.europa.eu](mailto:jrc-edgar@ec.europa.eu)

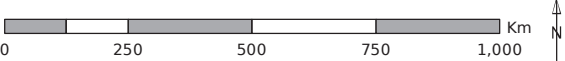

#### EMISSION DATA

Ship emission values are bottom-up calculated by the Emissions Database for Global Atmospheric Research (EDGAR), version v4.3.1 from the European Commission, Joint Research Centre. The bunker fuel statistics for international shipping from the IEA (2014) are taken as activity data and multiplied with technology-based emission factors from the EEA/EMEP guidebook (2013) and from Wang et al. (2007). Not only greenhouse gas emissions but also emissions from air pollutants and particles are calculated consistently with the same activity and technology data.

#### METHODOLOGY

The gridding methodology consists of two steps. Firstly, the world total emissions of international shipping are distributed using the world spatial proxy data of Wang et al. (2007). Then, the Baltic and Mediterranean Sea regions were regridded making use of the estimates of the vessel density from LRIT messages after a uniform sub-sampling of the vessel trajectories every 6 hours for one year for each cell of 0.1deg x 0.1deg (about (10km)<sup>2</sup>).
